# Supplementary material for: The value of informal care in the context of option B+ in Malawi: a contingent valuation approach
Source: BMC Health Serv Res. 2016 Apr 19;16:136. doi: 10.1186/s12913-016-1381-y (PMC4837588; doi:10.1186/s12913-016-1381-y)
Supplement: Additional file 1: — Data used in the analysis. (XLSX 130 kb) [file 12913_2016_1381_MOESM1_ESM.xlsx]

## Sheet: Sheet1
A1	A2	A3	A4	A5	A6	A7	A8	A9	B1	B2	B3	B4	B5	B6	B7	B8	B9	C1	C2	C3	C4	C5	C6	C7	C8	C9	C10	C11	C12	C13	C14a	C14b	C14c	C14d	C14e	C14f	C14g	C15a	C15b	C15c	C15d	C16	C17a	C17b	C17c	C17d	C17e	C17f	D1
2013-03-21	09:49:59.981000	NM	PURE/NM/P/05	PURE/NM/G/05	2	1	NTAMBALIKA	NJEMA	2	29	2	3	3	0	2	1	2	4	180	1	0		180	06:00:00	09:00:00	09:09:59.962000	4	0	2	The facility at my home is closer than this facility iam attending					5	6		0				2	2	2	2	2	2	2	1
2013-03-26	10:57:00	NM	PURE/NM/P/08	PURE/NM/G/08	1	1	MPALA	NJEMA	2	25	1	3	4	45000	2	1	2	6	60	3	3000	Grocery Business	40	07:52:00.019000	09:09:59.962000	10:50:00.010000	4	0	1	Mpala Health Centre is close to my home				4	5	6		1	2	3	4	2	2	2	2	2	2	2	1
2013-03-20	01:43:59.981000	NM	PURE/NM/P/04	PURE/NM/G/04	2	1	NTAMBALIKA	NJEMA	2	24	3	4	4	5600	2	1	2	6	210	3	150	Business	60	06:00:00	11:30:00.029000	12:00:00	4	0	1	The facility iam attending now is closer			3	4	5		7	1	2	3	4	2	2	2	2	2	2	2	1
2013-03-20	01:07:59.981000	NM	PURE/NM/P/03	PURE/NM/G/03	2	1	NTAMBALIKA	NJEMA	2	32	1	2	4	5000	2	1	2	2	180	2	0		60	07:59:59.971000	10:50:00.010000	10:59:59.971000	4	0	1	The distance is almost the same				4	5			1	2	3	4	2	2	2	2	2	2	2	1
2013-03-20	09:45:59.962000	NM	PURE/NM/P/02	PURE/NM/G/2	2	1	NAMASALIMA	NJEMA	2	22	1	3	4	5000	2	1	2	6	180	3	150	Busines	60	06:00:00	09:29:59.971000	09:40:00.019000	4	0	1	The facility at my home is closer than this facility iam attending		2		4		6		1	2	3	4	2	2	2	2	2	2	2	2
2013-03-26	10:21:00	NM	PUR/NM/P/07	PURE/NM/G/07	1	1	KUVALA	NKANDA	2	31	2	2	4	1500	2	1	2	6	120	5	200	Casual labour (Ganyu)	120	08:10:00.019000	10:09:59.990000	10:30:00	4	0	1	The facility at home Chisitu is closer to my home				4	5	6		1	2	3	4	2	2	2	2	2	2	2	1
2013-03-25	09:49:59.981000	NM	PURE/NM/P/06	PURE/NM/G/06	1	1	MAKUPIZA	MABUKA	2	30	1	4	4	6000	2	1	2	6	45	2	0		60	07:45:00.029000	09:04:59.981000	09:49:59.981000	4	0	1	The facility at home is closer than the facility iam attending				4		6		1	2	3	4	2	2	2	2	2	2	2	1
2013-04-16	10:56:00.038000	NM	PURE/NM/P/12	PURE/NM/G/12	4	2	GONG'ONTHA	MACHINJIRI	2	26	1	3	4	3500	2	1	2	6	5	1	0		10	10:30:00	11:15:00	11:17:59.971000	4	0	2				3		5	6		0	0	0	0	2	2	2	2	2	2	2	2
2013-04-04	01:30:00	NM	PURE/NM/P/8	PURE/NM/G/8	4	2	MKWATE	MACHINJIRI	2	36	1	1	4	30000	6	1	2	6	30	1	0		80	12:42:00.029000	13:20:00.038000	13:29:00.038000	4	0	2				3		5							2	2	2	2	2	2	2	1
2013-04-05	11:30:00.029000	NM	PURE/NM/P/09	PURE/NM/G/09	4	2	CHINUPULE	MACHINJIRI	2	21	1	3	8	0	6	1	1	6	20	1	0		2	10:50:00.010000	11:10:00.019000	11:30:00.029000	4	0	2					4		6						2	2	2	2	2	2	2	2
2013-04-05	09:22:00.019000	NM	PURE/NM/P/10	PURE/NM/G/10	4	2	CHINUNGULE 1	MACHINJIRI	2	18	1	2	6	0	2	1	2	6	10	1	0		60	09:09:59.962000	09:09:59.962000	09:20:00.010000	4	0	2		1			4	5							2	2	2	2	2	2	2	1
2013-04-24	03:13:00.019000	NM	PURE/NM/P/19	PURE/NM/G/19	3	5	KUFUNDA	KACHERE	2	25	3	4	3	3000	5	1	2	6	120	1	0		120	09:00:00	11:15:00	11:30:00.029000	4	0	2		1		3		5							2	2	2	2	2	2	2	2
2013-04-26	01:16:59.981000	NM	PURE/NM/P/22	PURE/NM/G/22	3	5	LOBI VILLAGE	KACHERE	2	30	1	1	7	0	3	1	2	6	30	1	0		10	07:00:00.029000	07:09:59.990000	07:32:00.010000	4	0	2							6						1	2	2	1	2	2	2	1
2013-04-25	01:00:00.029000	NM	PURE/NM/P/20	PURE/NM/G/20	3	5	HUWA	KACHERE	2	31	1	5	3	4000	5	1	2	6	60	1	0		120	07:45:00.029000	08:15:00	09:15:00.029000	4	0	1	The facility is further from my home	1					6		2				2	2	2	2	2	2	2	1
2013-05-26	02:39:59.990000	NM	PURE/NM/P/21	PURE/NM/G/21	3	5	KANYIMBI	KACHERE	2	28	3	2	8	0	3	1	2	6	120	1	0		150	08:19:59.981000	08:30:00.029000	12:00:00	4	0	2							6						2	2	2	2	2	2	2	2
2013-04-16	10:56:00.038000	NM	PURE/NM/P/15	PURE/NM/G/15	5	3	MBAZO	MLOLO	2	26	3	3	3	0	2	1	2	6	30	1	0		60	08:15:00	09:20:00.010000	09:49:59.981000	4	0	2							6						1	2	2	3	2	2	2	1
2013-04-16	11:33:00	NM	PURE/NM/P/16	PURE/NM/G/16	5	3	NALISONI	MLOLO	2	39	3	2	4	10000	6	1	2	6	20	3	50	Busines	20	10:39:59.962000	11:10:00.019000	11:30:00.029000	4	0	2					4		6						1	2	2	1	2	2	2	1
2013-03-20	10:12:59.962000	MU	PURE/MU/P/01	PURE/MU/G/01	2	1	Mtambalika	Njema	2	20	1	2	4	2000	2	1	2	2	180	1	0		90	07:59:59.971000	08:44:59.971000	10:09:59.990000	2	100	2		2	2	2	1	2	2	2	2	2	2	2	2	1	2	2	2	2	2	2
2013-03-20	11:17:59.971000	MU	PURE/MU/P/02	PURE/MU/02	2	1	Matimati	Njema	2	31	3	3	4	300	2	1	2	2	180	1	0		120	07:59:59.971000	10:00:00.029000	10:59:59.971000	4	0	2		2	2	2	1	2	2	2	2	2	2	2	2	2	2	2	2	2	2	2
2013-03-20	13:39:59.962000	MU	PURE/MU/P/03	PURE/MU/G/03	2	1	Mtambalika	Njema	2	20	1	3	7	2000	2	1	2	4	120	1	0		90	07:30:00	07:59:59.971000	10:00:00.029000	4	0	1	Muloza	1	2	2	2	2		2	1	1	1	1	1	2	2	1	2	2	2	2
2013-03-21	11:21:59.990000	MU	PURE/MU/P/04	PURE/MU/G/04	2	1	Maliyera	Njema	2	31	1	3	4	2720	2	1	2	6	180	1	0		10	07:59:59.971000	10:00:00.029000	13:00:00.029000	2	100	2		1	2	2	2	2	2	2	2	2	2	2	2	1	2		2	2	2	1
2013-03-25	09:42:59.990000	MU	PURE/MU/P/05	PURE/MU/G/05	1	1	Mambulu	Mabuka	2	32	1	3	2	22000	2	1	1	1	180	5	300	Business	60	07:20:00.038000	09:00:00	09:40:00.019000	2	600	1	Mimosa	2	2	2	2	2	1	2	1	1	1	1	2	2	2	2	2	2	2	1
2013-03-26	10:07:59.981000	MU	PURE/MU/P/06	PURE/MU/G/06	1	1	Misenje	Chikumbu	2	38	3	2	7	1800	2	1	2	6	180	1	0		150	07:30:00	09:00:00	09:45:00	1	0	1	Chisitu	2	2	2	1	2	1	2	1	1	1	1	2	2	2	2	2	2	2	1
2013-03-26	10:50:59.971000	MU	PURE/MU/P/07	PURE/MU/G/07	1	1	Namazoma	Mabuka	2	31	3	2	7	1000	6	1	2	4	180	3	150	Casual labour	120	08:30:00.029000	10:00:00.029000	10:30:00	3	200	1	Namazoma	2	2	2	1	2	2	2	2	2	2	2	1	1	2	1	2	2	2	1
2013-03-27	09:33:59.990000	MU	PURE/MU/P/08	PURE/MU/P/08	1	1	Makwale	Mabuka	2	25	3	3	4	500	2	1	1	6	120	1	0		60	07:00:00.029000	09:00:00	09:29:59.971000	2	100	1	Kang'oma	2	2	2	1	2	2	2	2	1	2	2	2	2	2	2	2	2	2	2
2013-04-04	14:42:59.962000	MU	PURE/MU/P/09	PURE/MU/P/09	4	2	Chinupule	Machinjiri	2	35	1	2	4	4500	2	2	2	6	60	1	0		30	13:00:00.029000	13:59:59.971000	14:39:59.990000	4	0	2		1	2	2	2	2	2	2	2	2	2	2	2	2	2	2	2	2	2	2
2013-04-04	15:18:59.962000	MU	PURE/MU/P/10	PURE/MU/G/10	4	2	Madulira	Machinjiri	2	32	1	3	4	2500	1	2	1	1	60	1	0		60	13:00:00.029000	13:59:59.971000	15:00:00	4	0	2		1	2	2	2	2	2	2	2	2	2	2	2	2	2	2	2	2		2
2013-04-05	14:46:59.981000	MU	PURE/MU/P/11	PURE/MU/G/11	4	2	Mlenga	Machinjiri	2	20	3	3	8	3000	1	2	2	6	60	1	0		60	13:00:00.029000	13:59:59.971000	14:30:00.029000	4	0	2		1	2	2	2	2	2	2	2	2	2	2	2	2	2	2	2	2	2	2
2013-04-09	10:21:59.962000	MU	PURE/MU/P/12	PURE/MU/G/12	4	2	Madulira	Machinjiri	2	30	1	5	4	40000	5	1	2	6	60	1	0		15	10:00:00.029000	10:05:00.010000	10:09:59.990000	4	0	2		1	2	2	2	2	2	2	2	2	2	2	2	2	2	2	2	2	2	2
2013-04-16	11:10:59.981000	MU	PURE/MU/P/13	PURE/MU/G/13	5	3	Phinifolo	Mulolo	2	28	3	2	7	1000	2	1	2	6	120	1	0		60	07:59:59.971000	10:00:00.029000	12:00:00	2	30	1	Trinity	1	2	2	2	2	2	2	1	1	1	1	2	2	2	2	2	2	2	1
2013-04-16	11:53:59.971000	MU	PURE/MU/P/14	PURE/MU/G/14	5	3	Singano	Mulolo	2	29	3	3	4	2000	6	1	2	6	120	2	0		120	10:59:59.971000	11:30:00.029000	11:50:00.038000	4	0	1	Masenjere	2	2	2	1	2	2	2	1	1	1	1	2	2	2	2	2	2	2	1
2013-04-17	09:56:59.971000	MU	PURE/MU/P/15	PURE/MU/G/15	5	3	Kilemesi	Mulolo	2	31	1	3	3	5000	2	1	1	1	60	2	0		90	08:44:59.971000	09:00:00	09:49:59.981000	1	100	2		2	2	2	1	2	2	2	2	2	2	2	2	2	2	2	2	2	2	1
2013-04-17	08:55:59.981000	MU	PURE/MU/P/16	PURE/MU/G/16	5	3	Gatoma	Mulolo	2	26	1	1	3	4000	6	1	1	1	60	1	0		120	07:59:59.971000	08:30:00.029000	08:50:00.038000	1	200	2		2	2	2	1	2	2	2	2	2	2	2	2	2	2	2	2	2	2	1
2013-04-23	12:56:00.010000	MU	PURE/MU/P/17	PURE/MU/G/17	3	5	Lobi	Kachere	2	22	1	1	7	1500	5	1	2	6	120	1	0		5	07:59:59.971000	10:00:00.029000	12:00:00	4	0	2		1	2	2	2	2	2	2	2	2	2	2	1	2	2	2	2	2	2	2
2013-04-26	12:26:00.038000	MU	PURE/MU/P/18	PURE/MU/G/18	3	5	Lobi	Kachere	2	33	2	4	7	3000	3	1	2	6	60	1	0		10	07:59:59.971000	09:00:00	09:45:00	4	0	1	Maonde	1	2	2	1	2	2	2	2	2	2	2	1	2	2	2	2	2	2	1
2013-05-02	08:12:00.029000	MU	PURE/MU/P/19	PURE/MU/G/19	6	4	Bula	Kwataine	2	24	2	3	7	400	5	1	2	6	120	1	0		120	09:00:00	10:00:00.029000	10:59:59.971000	4	0	2		1	2	2	2	2	2	2	2	2	2	2	2	2	2	2	2	2	2	1
2013-05-02	08:35:00.010000	MU	PURE/MU/P/20	PURE/MU/G/20	6	4	Bula	Kwataine	2	27	3	4	4	1500	5	1	2	6	120	1	0		30	07:00:00.029000	09:00:00	09:29:59.971000	2	50	2		1	2	2	2	2	2	2	2	2	2	2	2	2	2	2	2	2	2	1
2013-05-02	08:55:59.981000	MU	PURE/MU/P/21	PURE/MU/G/21	6	4	Bula	Kwataine	2	27	1	2	7	1000	5	1	2	6	60	1	0		120	07:59:59.971000	10:00:00.029000	10:59:59.971000	4	0	2		1	2	2	2	2	2	2	2	2	2	2	2	2	2	2	2	2	2	1
2013-05-02	09:09:59.962000	MU	PURE/MU/P/22	PURE/MU/G/22	6	4	Bula	Kwataine	2	30	1	1	3	2900	5	1	2	6	60	1	0		60	07:00:00.029000	09:00:00	10:00:00.029000	2	200	2		1	2	2	2	2	2	2	2	2	2	2	2	2	2	2	2	2	2	1
2013-03-20	10:39:00	BC	PURE/BC/P01	PURE/BC/G/01	2	1	MUJIWA	NJEMA	2	34	1	2	7	1800	2	1	2	6	30	1	0		120	07:59:59.971000	10:00:00.029000	10:30:00	4	0	1	MULOZA	2	2	2	2	2	1	2	1	1	1	1	2	1	2	2	2	2	2	1
2013-03-21	11:10:59.981000	BC	PURE/BC/P/02	PURE/BC/G/02	2	1	MALIYERA	NJEMA	2	23	3	3	3	5000	2	1	2	6	120	1	0		30	07:30:00	09:29:59.971000	10:59:59.971000	4	0	0	0	2	2	2	2	1	2	2					2	1	1	2	2	2	2	1
2013-03-20	12:47:00.010000	BC	PURE/BC/P/03	PURE/BC/G/03	2	1	MTAMBALIKA	NJEMA	2	23	1	3	4	5000	1	2	2	6	180	1	0		30	07:30:00	07:59:59.971000	10:59:59.971000	2	50	1	MULOZA	1	2	2	2	2	2	2	1	1	1	1	2	1	2	2	1	2	2	1
2013-03-21	13:05:59.971000	BC	PURE/BC/P/04	PURE/BC/G/04	2	1	MTAMBALIKA	NJEMA	2	21	3	3	3	1500	2	1	2	6	60	1	0		30	07:30:00	07:59:59.971000	10:00:00.029000	2	100	1	MULOZA	2	2	2	2	2	1	2	1	1	1	1	2	1	2	2	2	2	2	1
2013-03-25	09:42:59.990000	BC	PURE/BC/P/05	PURE/BC/G/05	1	1	CHISINKHA	MABUKA	2	24	2	2	4	2000	2	1	1	6	30	1	0	NA	20	08:05:00.038000	08:35:00.010000	09:29:59.971000	4	0	2	0	2	2	2	2	2	1	2	2	2	2	2	2	2	2	2	2	2	2	1
2013-03-26	10:02:00.038000	BC	PURE/BC/P/06	PURE/BC/G/06	1	1	MANGANI	CHIKUMBU	2	35	2	2	4	2000	2	1	2	6	60	1	0	NA	60	07:30:00	08:48:00.029000	10:00:00.029000	2	20	1	MULOZA	1	2	2	2	2	2	2	1	1	1	1	2	2	2	2	2	2	2	1
2013-03-26	10:36:59.990000	BC	PURE/BC/P/07	PURE/BC/G/07	1	1	LIJANGA	MABUKA	2	22	3	3	4	5000	2	1	2	6	2	1	0		120	09:00:00	10:09:59.990000	10:30:00	2	50	2	0	2	2	2	2	2	1	2	2	2	2	2	2	2	2	2	2	2	2	1
2013-03-26	11:01:59.981000	BC	PURE/BC/P/O8	PURE/BC/G/08	1	1	KASHONI	MABUKA	2	27	1	2	4	3000	2	1	2	6	60	5	150	Business	60	07:30:00	09:29:59.971000	10:50:00.010000	2	50	2	0	2	2	2	1	2	2	2	2	2	2	2	2	2	2	2	2	2	2	2
2013-04-05	10:11:00.038000	BC	PURE/BC/P/09	PURE/BC/G/09	4	2	CHINUPULE	MACHINJIRI	2	27	1	3	4	5000	2	1	2	6	30	1	0		10	09:29:59.971000	09:49:59.981000	10:09:59.990000	4	0	1	LIMBE	1	2	2	2	2	2	2	1	1	1	1	2	2	2	2	2	2	2	1
2013-04-05	14:50:00.038000	BC	PURE/BC/P/10	PURE/BC/G/10	4	2	MATENJE	MACHINJIRI	2	22	1	4	6	6000	6	1	2	6	60	1	0		20	09:00:00	09:29:59.971000	10:00:00.029000	4	0	1	LIMBE	1	2	2	2	2	2	2	1	1	1	2	2	2	2	2	2	2	2	2
2013-04-08	10:02:00.038000	BC	PURE/BC/P/11	PURE/BC/G/11	4	2	KACHERE	KAPENI	2	20	1	4	4	11500	1	2	2	6	60	1	0		30	07:59:59.971000	09:00:00	09:58:00.019000	4	0	1	LIMBE	1	2	2	2	2	2	2	1	1	1	1	2	2	2	2	2	2	2	2
2013-04-09	11:06:00	BC	PURE/BC/P/12	PURE/BC/G/12	4	2	MKWATE	MACHINJIRI	2	18	4	3	6	500	5	1	2	6	30	1	0		30	10:00:00.029000	10:30:00	10:59:59.971000	4	0	1	LIMBE	1	2	2	2	2	2	2	1	1	1	1	1	2	2	2	2	2	2	2
2013-04-16	11:06:59.962000	BC	PURE/BC/P13	PURE/BC/G/13	5	3	MWALIJA	MULOLO	2	38	1	3	3	50000	6	1	2	6	120	1	0		60	07:59:59.971000	10:00:00.029000	10:59:59.971000	4	0	1	MAKHANGA	2	2	2	2	2	1	2	1	1	1	1	1	1	2	2	2	2	2	1
2013-04-16	12:27:59.962000	BC	PURE/BC/P/14	PURE/BC/G/14	5	3	WADISONI	MULOLO	2	30	1	3	3	2000	6	1	2	6	120	1	0		120	10:00:00.029000	10:09:59.990000	12:00:00	4	0	1	MPHANDE	1	2	2	2	2	2	2	1	1	2	2	1	1	2	2	2	2	2	1
2013-04-17	09:15:59.990000	BC	PURE/BC/P/15	PURE/BC/G/15	5	3	GOKE	MULOLO	2	26	3	2	3	500	6	1	1	6	30	1	0		60	07:59:59.971000	08:30:00.029000	09:00:00	4	0	2	0	1	2	2	2	2	2	2	2	2	2	2	2	2	2	2	2	2	2	1
2013-04-17	10:21:00	BC	PURE/BC/P/16	PURE/BC/G/16	5	3	CHITSEKO	MULOLO	2	24	1	3	3	2000	6	1	2	6	120	1	0		20	07:59:59.971000	08:10:00.019000	10:09:59.990000	4	0	2	0	1	2	2	2	1	2	2	2	2	2	2	2	2	2	2	2	2	2	1
2013-04-23	09:36:59.962000	BC	PURE/BC/P17	PURE/BC/G/17	3	5	MTUTUMA	KACHERE	2	29	1	4	3	4500	5	1	2	3	20	1	0		15	08:39:59.990000	09:00:00	09:29:59.971000	4	0	1	MTEMDERE	1	2	2	1	2	1	2	1	1	1	1	2	2	2	2	2	2	2	1
2013-04-23	12:45:00	BC	PURE/BC/P/18	PURE/BC/G/18	3	5	LOBI	KACHERE	2	35	1	2	4	5000	5	1	2	6	20	1	0		10	11:30:00.029000	11:50:00.038000	12:00:00	4	0	2	0	1	2	2	1	2	2	2	2	2	2	2	1	1	2	2	2	2	2	1
2013-04-24	14:59:00.038000	BC	PURE/BC/P/19	PURE/BC/G/19	3	5	KUMFUNDA	KACHERE	2	34	1	3	3	7000	3	1	2	6	60	1	0		90	13:30:00	14:30:00.029000	15:00:00	4	0	1	MAUNDE	2	2	2	1	2	1	2	2	2	2	2	1	2	2	2	2	2	1	1
2013-04-25	12:49:00.019000	BC	PURE/BC/P/20	PURE/BC/G/20	3	5	NSANANGWE	KACHERE	2	33	1	1	7	2800	3	1	1	6	30	3	200	CASUAL WORK	60	12:29:59.971000	13:00:00.029000	13:30:00	4	0	2	0	1	2	2	1	1	2	2	2	2	2	2	2	2	2	2	2	2	2	2
2013-04-26	11:46:59.981000	BC	PURE/BC/P/21	PURE/BC/G/21	3	5	KAINGA	KACHERE	2	31	1	3	4	9000	3	1	2	6	60	1	0		8	10:38:00.038000	10:59:59.971000	11:44:59.971000	4	0	2	0	1	2	2	1	1	1	2	2	2	2	2	2	2	2	2	2	2	2	1
2013-04-30	09:13:59.981000	BC	PURE/BC/P/22	PURE/BC/G/22	6	4	BULA	KWATAINE	2	33	1	2	4	4000	5	1	1	6	30	1	0		30	08:30:00.029000	08:39:59.990000	09:09:59.962000	4	0	2	0	1	2	1	1	1	1	2	2	2	2	2	1	2	2	1	2	2	2	1
2013-05-02	08:32:00.038000	BC	PURE/BC/P/23	PURE/BC/G/23	6	4	BULA	KWATAINE	2	32	1	4	3	4300	5	1	2	6	30	1	0		30	07:30:00	07:59:59.971000	08:30:00.029000	4	0	2	0	1	1	2	1	2	1	2	2	2	2	2	2	2	2	2	2	2	2	1
2013-05-02	08:48:59.990000	BC	PURE/BC/P/24	PURE/BC/G/24	6	4	CHEPA	KWATAINE	2	20	1	3	7	1000	5	1	2	6	20	1	0		30	07:59:59.971000	08:30:00.029000	08:44:59.971000	4	0	1	DZUNJE	1	2	2	2	1	1	2	2	2	2	2	2	2	2	2	2	2	2	1
2013-05-02	09:13:59.981000	BC	PURE/BC/P/25	PURE/BC/G/25	6	4	CHEPA	KWATAINE	2	36	1	3	4	21700	5	1	2	6	10	1	0		90	08:39:59.990000	08:50:00.038000	09:02:59.971000	4	0	1	DZUNJE	1	2	2	1	1	1	2	1	1	2	2	2	2	2	2	2	2	2	1
2013-03-20		Geoffrey Kampupu Ziba	PURE/GKZ/P/01	PURE/GKZ/G/01	2	1	Maliyela	Njema	2	22	1	3	3	2000	2	1	1	4	20	1	0		25	08:03:00.029000	08:03:59.990000	08:24:00	4	0	2	Muloza Health Centre	2	1	2	2	2	2	2	3	3	3	3	2	2	2	2	2	2	2	1
2013-03-20		Geoffrey Kampupu Ziba	PURE/GKZ/P/02	PURE/GKZ/G/02	2	1	Mdala	Njema	2	26	1	3	4	10000	2	1	1	6	150	3	100	Husband	60	06:04:59.981000	10:20:00.038000	10:30:00	4	0	1	Outreach (Mobile) 2C2l2i2n2i2c2	2	2	2	1	2	2	2	2	1	2	2	2	2	2	2	2	2	2	1
2013-03-20		Geoffrey Kampupu Ziba	PURE/GKZ/P/03	PURE/GKZ/G/03	2	1	Mtambalika	Njema	2	25	1	2	4	2000	1	2	2	6	120	3	100	Husband	45	07:00:00.029000	07:59:59.971000	10:00:00.029000	2	150	1	Muloza Health Centre	2	2	2	2	2	1	2	2	1	1	1	2	2	2	2	2	2	2	1
2013-03-21		Geoffrey Kampupu Ziba	PURE/GKZ/P/04	PURE/GKZ/G/04	2	1	Maliyela	Njema	2	23	2	4	4	5000	2	1	2	1	480	1	0		120	07:59:59.971000	13:59:59.971000	16:20:00.038000	4	0	2	Muloza Health Centre	1	2	2	2	2	2	2	3	3	3	3	2	2	2	2	2	2	2	1
2013-03-26		Geoffrey Kampupu Ziba	PURE/GKZ/P/05	PURE/GKZ/G/05	1	1	Mapereka	Mabuka	2	31	1	2	3	500	2	1	1	1	90	2	0		75	06:00:00	09:00:00	09:15:00.029000	4	0	1	Nthembe Private Clini	2	1	2	2	2	2	2	1	1	2	2	1	2	2	1	2	2	2	1
2013-03-26		Geoffrey Kampupu Ziba	PURE/GKZ/P/06	PURE/GKZ/G/06	1	1	Nansila	Mabuka	2	36	1	5	3	3150	2	1	2	1	150	1	0		120	07:59:59.971000	10:30:00	11:19:59.981000	4	0	2	Mulanje District Hospital	1	2	2	2	2	2	2	3	3	3	3	2	2	2	2	2	2	2	1
2013-03-26		Geoffrey Kampupu Ziba	PURE/GKZ/P/07	PURE/GKZ/G/07	1	1	Mbewa	Mabuka	2	31	3	1	4	1500	2	1	2	6	30	1	0	0	180	07:59:59.971000	07:59:59.971000	11:30:00.029000	3	20	1	Mulanje District Hospital	1	2	2	2	2	2	2	1	1	1	1	2	2	2	2	2	2	2	2
2013-03-27		Geoffrey Kampupu Ziba	PURE/GKZ/P/08	PURE/GKZ/G/O8	1	1	Chilembwe	Mkanda	2	30	3	2	4	700	1	1	2	6	150	1	0		120	07:30:00	10:00:00.029000	10:20:00.038000	4	0	1	Mulanje Mission Hospital	2	2	2	2	2	2	1	1	1	1	1	1	2	2	1	2	2	2	1
2013-04-05		Geoffrey Kampupu Ziba	PURE/GKZ/P/09	PURE/GKZ/G/09	4	2	Mkwate	Machinjiri	2	23	1	5	8	10000	5	1	1	6	150	5	100	Husband	50	08:10:00.019000	08:19:59.981000	10:50:00.010000	4	0	1	BM Kachale Private Clinic	2	2	2	1	2	2	2	2	1	2	2	2	2	2	2	2	2	2	1
2013-04-04		Geoffrey Kampupu Ziba	PURE/GKZ/P/10	PURE/GKZ/G/10	4	2	Chinupule 1	Machinjiri	2	31	1	3	4	16000	2	1	2	3	40	1	0		45	13:59:59.971000	14:39:59.990000	14:50:00.038000	4	0	1	Makhetha Health Centre	2	2	2	1	2	2	2	2	1	2	2	2	2	2	2	2	2	2	2
2013-04-11		Geoffrey Kampupu ZIba	PURE/GKZ/P/11	PURE/GKZ/G/11	4	2	Ndilekeni	Machinjiri	2	22	1	3	8	8000	2	1	2	3	15	1	0		60	10:14:59.971000	10:20:00.038000	10:34:59.981000	2	20	1	LMJ Private Clinic	2	2	2	1	2	2	2	1	1	2	2	2	2	2	2	2	2	2	2
2013-04-09		Geoffrey Kampupu Ziba	PURE/GKZ/P/12	PURE/GKZ/G/12	4	2	Chinupule	Machinjiri	2	17	2	7	8	2	2	1	2	3	16	1	0		30	09:00:00	09:29:59.971000	09:45:59.962000	4	0	1	LMJ Private Clinic	1	2	2	2	2	2	2	1	1	2	2	2	2	2	2	2	2	2	1
2013-04-17		Geoffrey Kampupu Ziba	PURE/GKZ/P/13	PURE/GKZ/G/13	5	3	Maheya	Mlolo	2	25	1	2	8	0	6	1	1	6	4	1	0		10	09:00:00	09:04:00.019000	09:13:59.981000	4	0	2	Trinity Mission Hospital	1	2	2	2	2	2	2	3	3	3	3	2	2	2	2	2	2	2	1
2013-04-17		Geoffrey Kampupu Ziba	PURE/GKZ/P/14	PURE/GKZ/14	5	3	Mwanavumbi	Mlolo	2	33	1	3	3	0	2	1	2	1	270	1	0		150	07:00:00.029000	11:30:00.029000	11:44:59.971000	4	0	1	Makhanga Health Centre	2	2	2	1	2	2	2	1	1	1	1	2	2	2	2	2	2	2	1
2013-04-18		Geoffrey Kampupu Ziba	PURE/GKZ/P/15	PURE/GKZ/G/15	5	3	Nalisoni	Mlolo	2	23	1	3	3	5000	2	1	2	6	240	1	0		20	07:30:00	11:30:00.029000	11:44:59.971000	4	0	2	Trinity Mission Hospital	1	2	2	2	2	2	2	3	3	3	3	1	2	2	1	2	2	2	1
2013-04-17		Geoffrey Kampupu Ziba	PURE/GKZ/P/16	PURE/GKZ/G/16	5	3	M'phiphila	Mlolo	2	25	1	2	3	1000	2	1	2	3	150	1	0		120	07:59:59.971000	10:30:00	10:39:59.962000	4	0	2	Trinity Mission Hospital	1	2	2	2	2	2	2	3	3	3	3	1	2	2	2	1	2	2	1
2013-04-15		Geoffrey Kampupu Ziba	PURE/GKZ/P/17	PURE/GKZ/G/17	5	3	Gatoma	Mlolo	2	22	4	5	3	1500	2	1	1	6	40	1	0		5	14:39:59.990000	15:20:00.010000	15:24:59.990000	4	0	2	Trinity Mission Hospital	1	2	2	2	2	2	2	3	3	3	3	2	2	2	2	2	2	2	2
2013-04-22		Geoffrey Kampupu Ziba	PURE/GKZ/P/18	PURE/GKZ/G/18	3	5	Kainga	Kachere	2	32	1	3	4	250000	5	1	1	6	10	1	0		5	10:50:00.010000	10:50:59.971000	11:01:00.019000	4	0	2	LLobi Health Centre	1	2	2	2	2	2	2	3	3	3	3	2	2	2	2	2	2	2	1
2013-04-25		Geoffrey Kampupu Ziba	PURE/GKZ/P/19	PURE/GKZ/G/19	3	5	Lobi	Kachere	2	31	1	3	4	30000	3	1	2	6	5	1	0		5	13:59:59.971000	14:10:00.019000	14:15:00	4	0	2	Lobi Health Centre	1	2	2	2	2	2	2	3	3	3	3	2	2	2	2	2	2	2	1
2013-04-24		Geoffrey Kampupu Ziba	PURE/GKZ/P/20	PURE/GKZ/G/20	3	5	Mtonga	Kachere	2	29	1	3	7	2000	3	1	2	3	8	1	0		150	10:00:00.029000	10:00:59.990000	10:09:00.029000	4	0	1	Chimoto Health Centre	2	2	2	1	2	2	2	1	1	1	1	1	2	2	1	2	2	2	1
2013-04-25		Geoffrey Kampupu Ziba	PURE/GKZ/P/21	PURE/GKZ/G/21	3	5	Chinkhu	Kachere	2	20	1	2	7	300	3	1	2	3	30	2	0		20	13:30:00	13:32:00.010000	14:01:59.981000	4	0	0	Lobi Health Centre	1	2	2	2	2	2	2	3	3	3	3	2	2	2	2	2	2	2	1
2013-04-23		Geoffrey Kampupu Ziba	PURE/GKZ/P/22	PURE/GKZ/G/22	3	5	Lobi	Kachere	2	32	3	3	3	3500	5	1	2	6	255	1	0		5	07:30:00	11:39:59.990000	11:55:00.019000	4	0	2	Lobi Health Centre	1	2	2	2	2	2	2	3	3	3	3	1	2	2	1	2	2	2	1
2013-05-02		Geoffrey Kampupu Ziba	PURE/GKZ/P/23	PURE/GKZ/G/23	6	4	Fulatila	Makwangwala	2	32	1	3	3	500	5	1	2	6	90	1	0		120	07:00:00.029000	07:59:59.971000	08:30:00.029000	4	0	2	Nsipe Health Centre	1	2	2	2	2	2	2	3	3	3	3	2	2	2	2	2	2	2	1
2013-05-02		Geoffrey Kampupu Ziba	PURE/GKZ/P/24	PURE/GKZ/G/24	6	4	Chikavumbwa	Kwataine	2	19	1	3	7	2000	5	1	2	3	20	1	0		5	08:10:00.019000	08:30:00.029000	09:15:00.029000	4	0	2	Nsipe Health Centre	1	2	2	2	2	2	2	3	3	3	3	2	2	2	2	2	2	2	1
2013-05-02		Geoffrey Kampupu Ziba	PURE/GKZ/P/25	PURE/GKZ/G/25	6	4	Zidana	Kwataine	2	21	4	2	8	9000	5	1	2	3	60	1	0		20	07:59:59.971000	09:00:00	10:20:00.038000	4	0	2	Nsipe Health Centre	1	2	2	2	2	2	2	3	3	3	3	2	2	2	2	2	2	2	2
2013-05-02		Geoffrey Kampupu Ziba	PURE/GKZ/P/26	PURE/GKZ/G/26	6	4	Zidana	Kwataine	2	23	1	4	8	3000	5	1	2	3	15	1	0		20	09:00:00	09:15:00.029000	10:00:00.029000	4	0	2	Nsipe Health Centre	1	2	2	2	2	2	2	3	3	3	3	2	2	2	2	2	2	2	2
2013-05-02		Geoffrey Kampupu Ziba	PURE/GKZ/P/27	PURE/GKZ/G/27	6	4	Zidana	Kwataine	2	22	1	3	7	600	5	1	2	3	20	1	0		30	10:00:00.029000	10:00:00.029000	11:10:00.019000	4	0	2	Nsipe Health Centre	1	2	2	2	2	2	2	3	3	3	3	2	2	2	2	2	2	2	1
2013-05-02		Geoffrey Kampupu Ziba	PURE/GKZ/P/28	PURE/GKZ/G/28	6	4	Fulatila	Makwangwala	2	35	1	2	4	2000	5	1	2	6	150	1	0		120	07:00:00.029000	09:29:59.971000	09:35:00.038000	1	150	2	Nsipe Health Centre	1	2	2	2	2	2	2	3	3	3	3	2	2	2	2	2	2	2	1
2013-05-02		Geoffrey Kampupu Ziba	PURE/GKZ/P/29	PURE/GKZ/G/29	6	4	Zidana	Kwataine	2	30	2	3	3	1500	5	1	2	3	30		1	0	30	09:00:00	09:29:59.971000	10:00:00.029000	4	0	2	Nsipe Health Centre	1	2	2	2	2	2	2	3	3	3	3	2	2	2	2	2	2	2	1
[truncated: 328 more columns]
